# Supplementary material for: A core–shell Y zeolite with a mono-crystalline core and a loosely aggregated polycrystalline shell: a hierarchical cracking catalyst for large reactants
Source: Royal Society of Chemistry journal article supplement (doi:10.1039/c9cy02577d), 2020-01-01
Supplement: c9cy02577d1.pdf [file c9cy02577d1.pdf]

*Electronic Supplementary Information*

# **Core-shell Y zeolite with a mono-crystalline core and a loosely aggregating polycrystalline shell: a hierarchically cracking catalyst for large reactants**

Yanchao Liu<sup>1#</sup>, Bo Qin<sup>2#</sup>, Hexin Gao<sup>1</sup>, Weiwei Ning<sup>1</sup>, Lichen Zhang<sup>1</sup>, Jiajun Zheng<sup>1\*</sup>, Yanze Du<sup>1, 2</sup>,

Yan Wang<sup>1</sup>, Wenlin Li<sup>1</sup>, Ruifeng Li<sup>1\*</sup>

<sup>1</sup> Research Centre of Energy Chemical & Catalytic Technology, Taiyuan University of Technology, Taiyuan 030024, China; <sup>2</sup> Dalian Research Institute of Petroleum & Petrochemicals, SINOPEC, Dalian 116045, China.

Corresponding Authors:

\* Email: [zhengjiajun@tyut.edu.cn](mailto:zhengjiajun@tyut.edu.cn); [rfl@tyut.edu.cn](mailto:rfl@tyut.edu.cn). TEL: +86 03516018384

# These authors contribute equally to this paper

Post Address:

College of Chemistry and Chemical Engineering, Taiyuan University of Technology

79# West Yingze Street, Taiyuan 030024, China.

**Table S1.** Product distributions of catalytic cracking of triisopropylbenzene (TIPB) over Y and core-shell Y@NY-3-24

| Catalysts<br>Selectivity (wt.%)                                       | Y     | Y@NY-3-24 |
|-----------------------------------------------------------------------|-------|-----------|
| CH <sub>4</sub>                                                       | 0.07  | 0.06      |
| C <sub>2</sub> H <sub>6</sub>                                         | 0.04  | 0.05      |
| C <sub>2</sub> H <sub>4</sub>                                         | 0.18  | 0.12      |
| C <sub>3</sub> H <sub>8</sub>                                         | 0.75  | 1.55      |
| C <sub>3</sub> H <sub>6</sub>                                         | 7.50  | 36.48     |
| <i>i</i> -C <sub>4</sub> H <sub>10</sub>                              | 0.29  | 0.54      |
| <i>n</i> -C <sub>4</sub> H <sub>10</sub>                              | 0.03  | 0.02      |
| <i>i</i> -C <sub>4</sub> H <sub>8</sub>                               | 0.20  | 0.47      |
| <i>n</i> -C <sub>4</sub> H <sub>8</sub>                               | 0.04  | 0.08      |
| <i>i</i> -C <sub>5</sub> H <sub>12</sub>                              | 0.11  | 0.14      |
| <i>n</i> -C <sub>5</sub> H <sub>12</sub>                              | 1.06  | 0.06      |
| benzene                                                               | 20.23 | 15.86     |
| isopropylbenzene (IPB)                                                | 6.28  | 22.51     |
| diisopropylbenzene (DIPB)                                             | 28.78 | 16.08     |
| Coking                                                                | 34.44 | 6.05      |
| <sup>①</sup> Conversion (wt.%)                                        | 39.89 | 63.72     |
| <sup>②</sup> Theoretical selectivity of C <sub>3</sub> H <sub>6</sub> | 44.64 | 45.55     |

<sup>①</sup>Reaction condition: Catalytic cracking of TIPB was executed at 450 °C, catalyst: reactant=51.09, g/mol, the contact time between reactants and catalyst was controlled within 5-8s.

<sup>②</sup>Theoretical selectivity of C<sub>3</sub>H<sub>6</sub>: The value is calculated under the condition that the propylene, which was yielded from the cracking of TIPB as well as DIPB and IPB, is not further cracked or polymerized, namely,  $n_{TP}=n_D+2*n_I+3*n_B$ , “ $n_{TP}$ ” is the theoretical amount of propylene (mol),  $n_D$ ,  $n_I$  and  $n_B$  is the amount (mol) of DIPB, IPB and Benzene detected by GC, respectively.

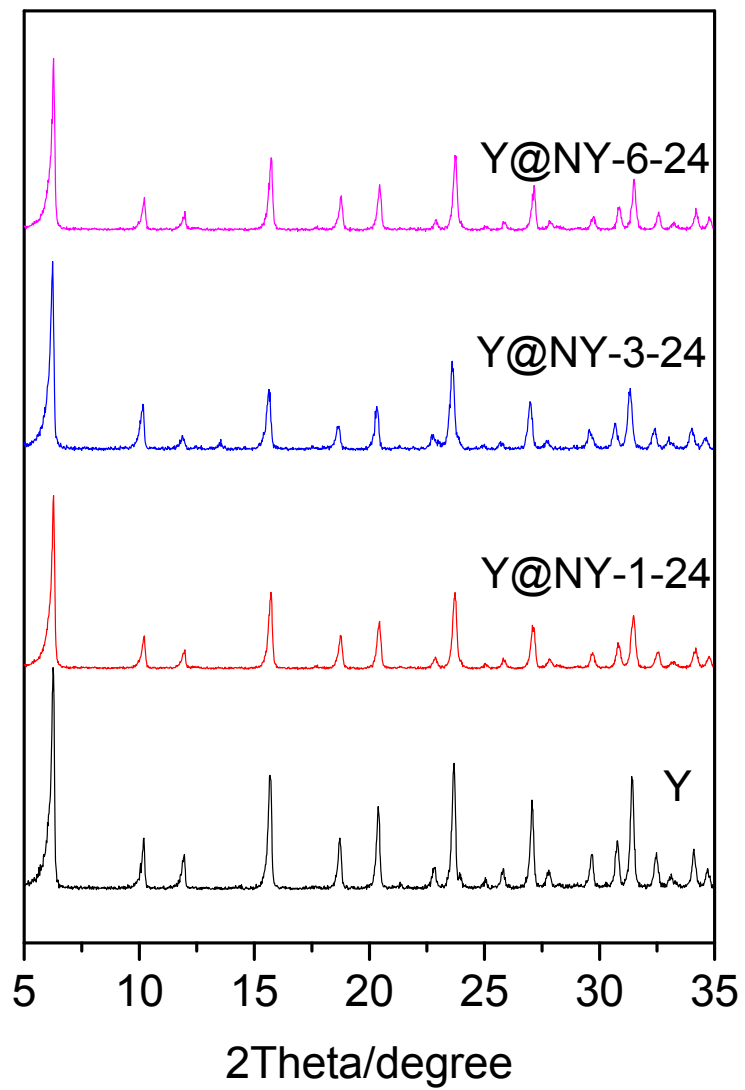

**Figure S1.** XRD patterns of the starting Y zeolite, Y@NY-1-24, Y@NY-3-24, and Y@NY-6-24

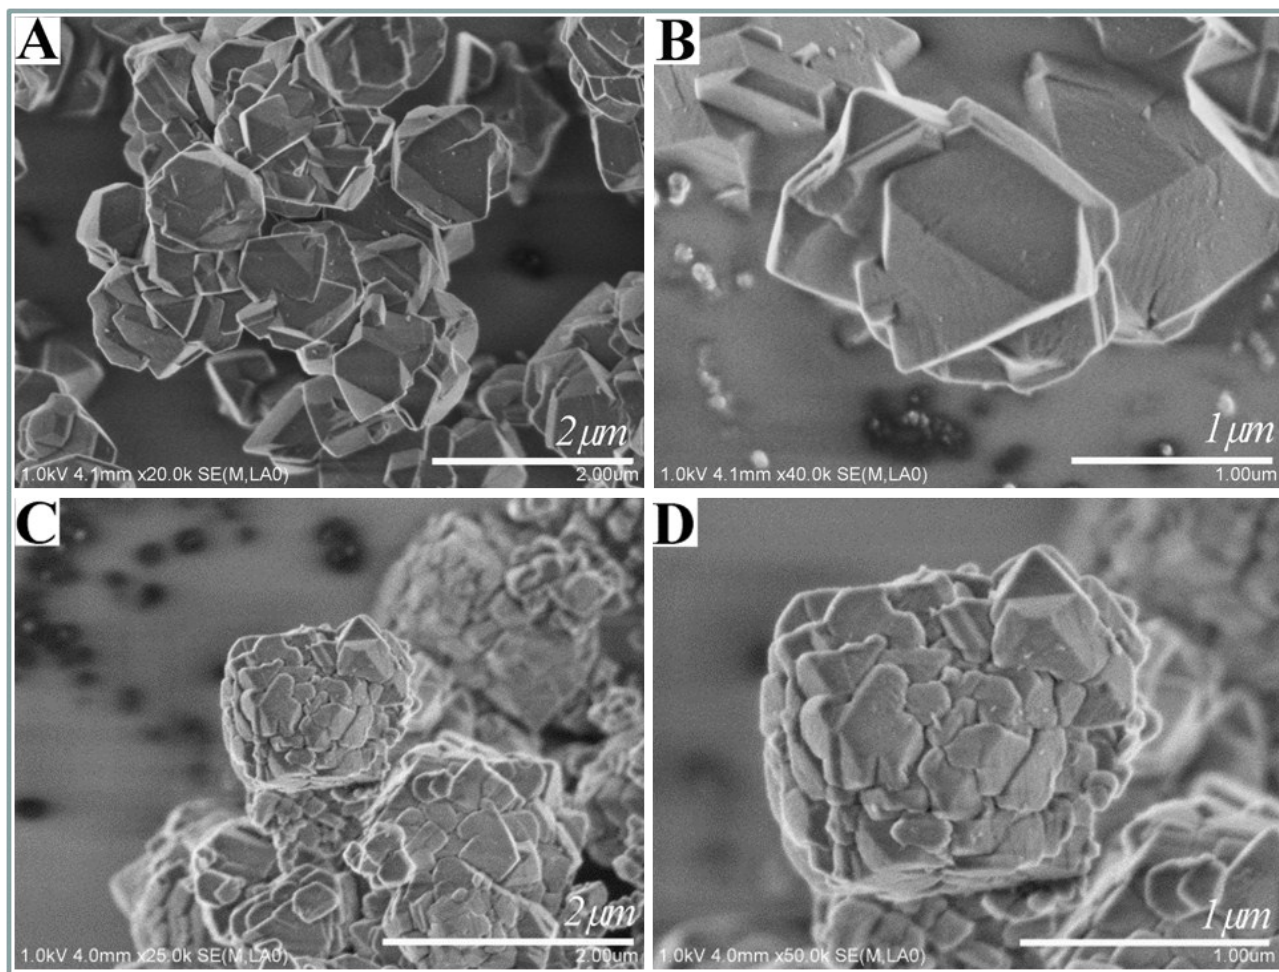

**Figure S2.** SEM images of the samples. (A), (B): the commercial Y zeolite; (C), (D): the as-synthesized Y@NYr-3-24.

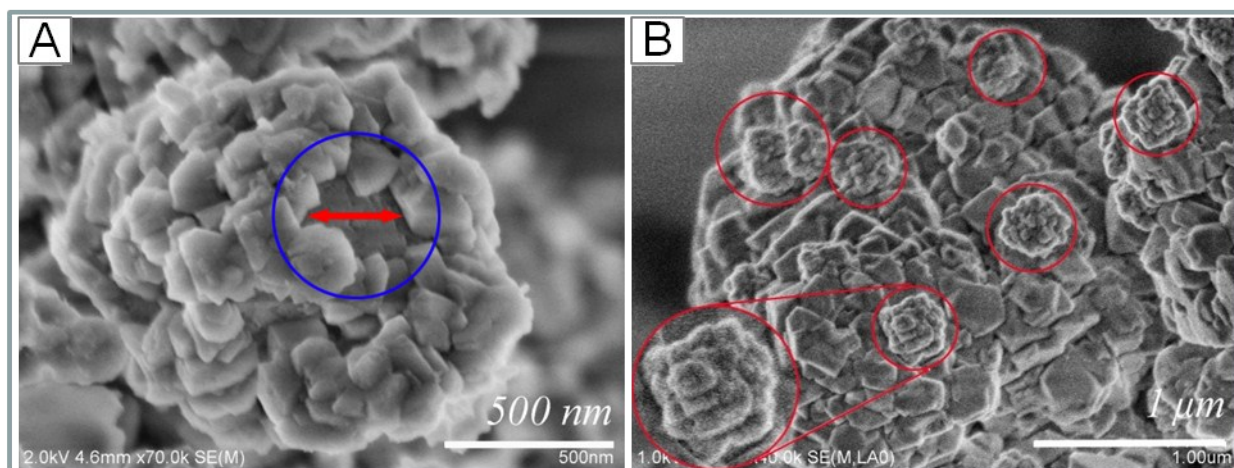

**Figure S3.** SEM images of (A): Y@NY-6-24; (B): Y@NY-1-24.

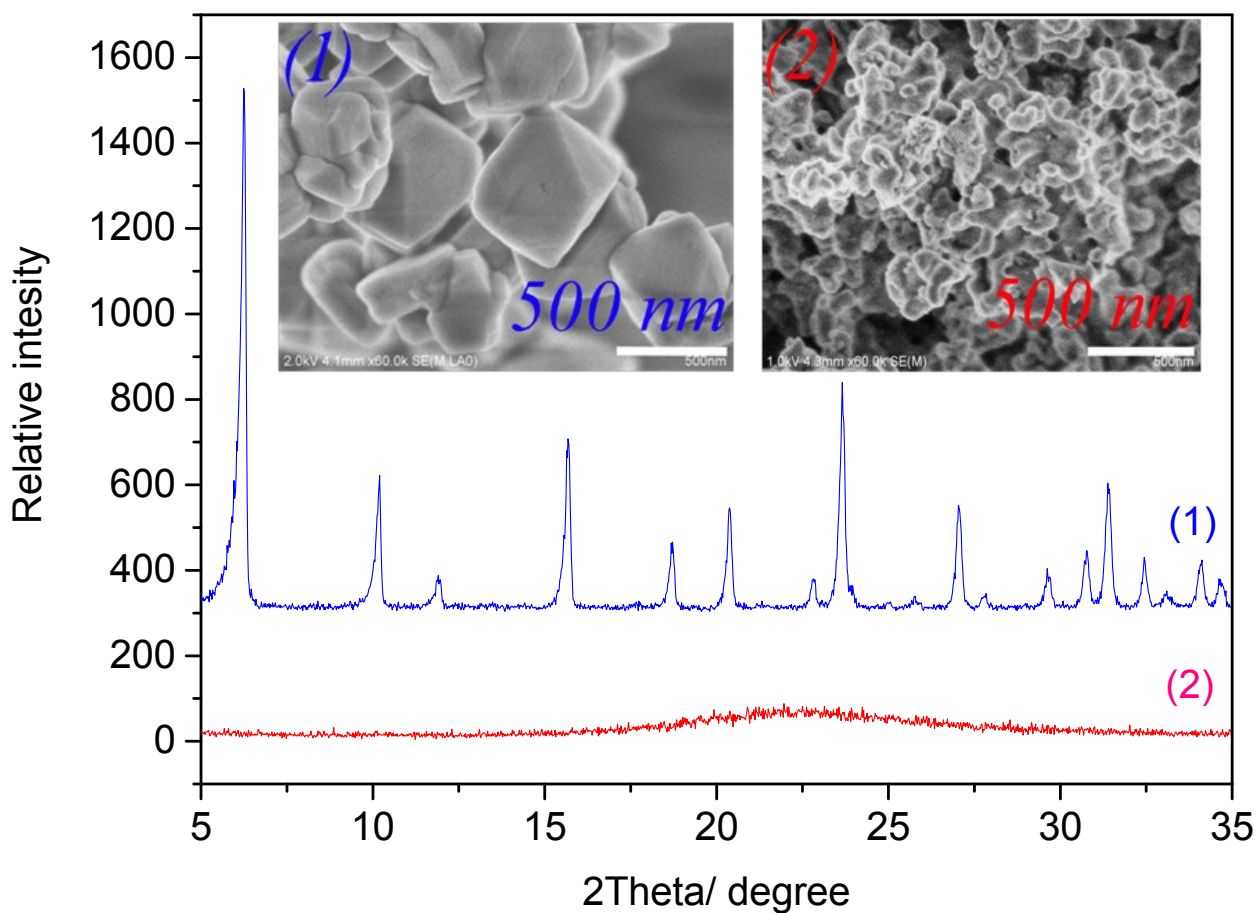

**Figure S4.** XRD patterns and SEM images (insets) of Y@NY-0-24 and Y@NYr-0-24 samples which were respectively obtained by a similar procedure of Y@NY and Y@NYr, in which the core, namely the starting Y zeolite, was absent. (1) Y@NYr-0-24; (2): Y@NY-0-24.

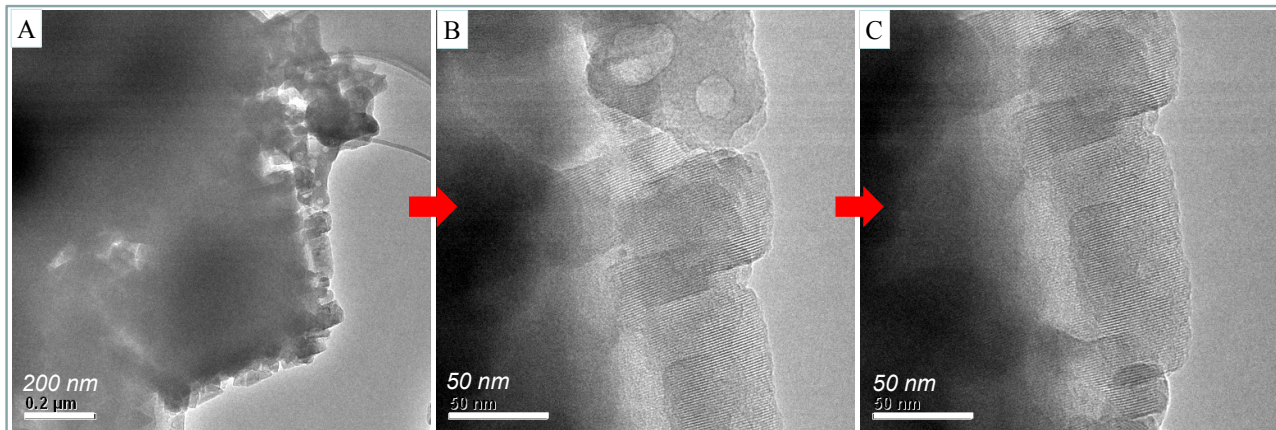

**Figure S5.** TEM images of sample Y@NY-3-12

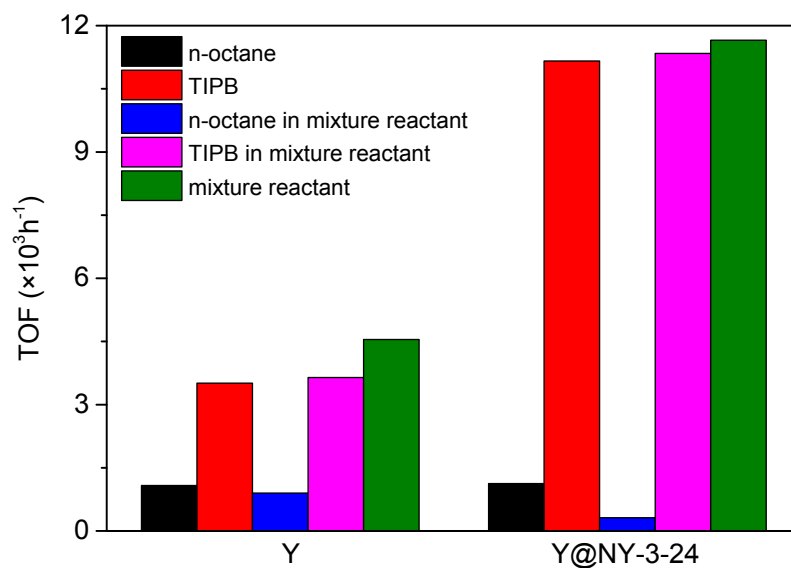

**Figure S6.** Turnover frequency (TOF) of the reactant over the HY and HY@NY-3-24. Since the active sites in the catalytic cracking of hydrocarbon would be positively related to Brønsted acid. The TOF was obtained by calculating the molecule number (mol) of reacted reactant per Brønsted acid sites (mol) per hour.
